# Supplementary material for: Anti-Cancer and Electrochemical Properties of Thiogenistein—New Biologically Active Compound
Source: MDPI journal article supplement (doi:10.3390/ijms22168783), 2021-08-16
Supplement: s1 [file s1]

# Supporting Information

## Anti-Cancer and Electrochemical Properties of Thiogenistein—New Biologically Active Compound

Elżbieta U. Stolarczyk<sup>1,\*</sup>, Weronika Strzempek<sup>2,3</sup>, Marta Łaszcz<sup>1</sup>, Andrzej Leś<sup>4</sup>, Elżbieta Menaszek<sup>3</sup>, Katarzyna Sidoryk<sup>5</sup> and Krzysztof Stolarczyk<sup>4</sup>

- <sup>1</sup> Analytical Department, Research Analytics Team, Łukasiewicz Research Network—Industrial Chemistry Institute, 8 Rydygiera Street, 01-793 Warsaw, Poland; marta.laszcz@ichp.pl
- <sup>2</sup> Faculty of Chemistry, Jagiellonian University, 2 Gronostajowa Street, 30-387 Krakow, Poland; weronika.strzempek@doctoral.uj.edu.pl (W.S.)
- <sup>3</sup> Faculty of Pharmacy, Collegium Medicum, Jagiellonian University, 9 Medyczna Street, 30-068 Krakow, Poland; elzbieta.menaszek@uj.edu.pl
- <sup>4</sup> Faculty of Chemistry, University of Warsaw, 1 Pasteura Street, 02-093 Warsaw, Poland; ales@chem.uw.edu.pl (A.L.); kstolar@chem.uw.edu.pl (K.S.)
- <sup>5</sup> Department of Pharmacy, Cosmetic Chemistry and Biotechnology, Chemistry Group, Łukasiewicz Research Network—Industrial Chemistry Institute, 8 Rydygiera Street, 01-793 Warsaw, Poland; katarzyna.sidoryk@ichp.pl

\*Correspondence: elzbieta.stolarczyk@ichp.pl; Tel.: +48-22-568-25-81

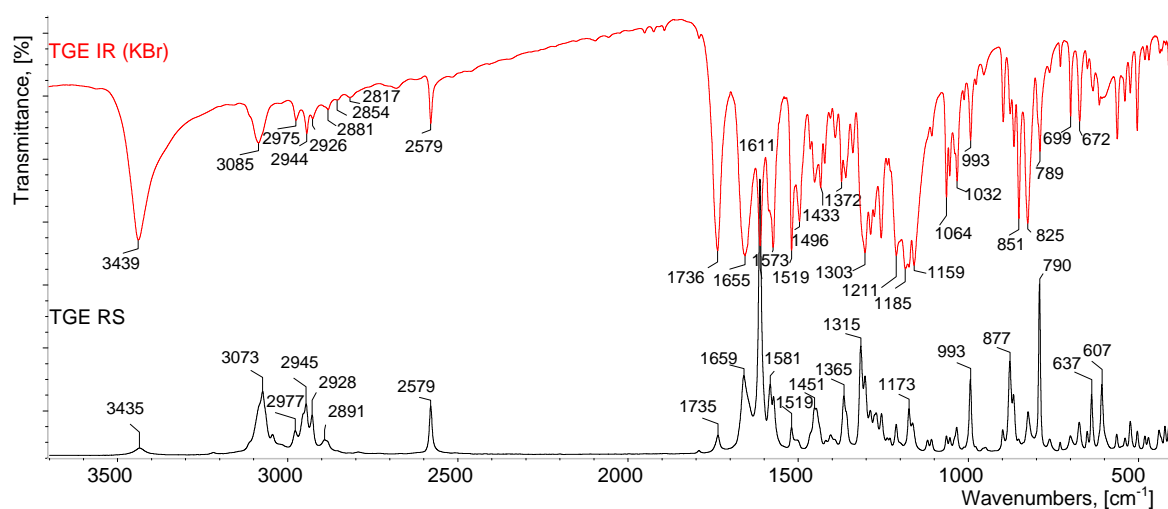

Fig. S1. IR (red) and Raman spectra (blue) of TGE.

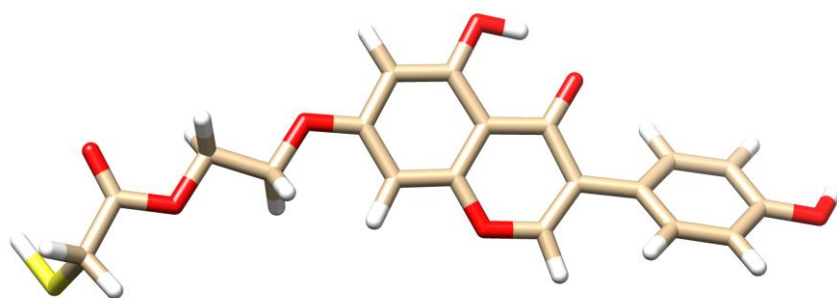

**Fig. S2.** The optimal geometry of the TGE molecule with the intramolecular hydrogen bond  $C(4)=O \cdots HO-C(5)$  following the B3LYP/6-311++G(d,p) calculations. The H(O at C-5)-O(at C-4) distance is 1.70 Å. Colors of atoms: H-white, C-gold, O-red, S-yellow.

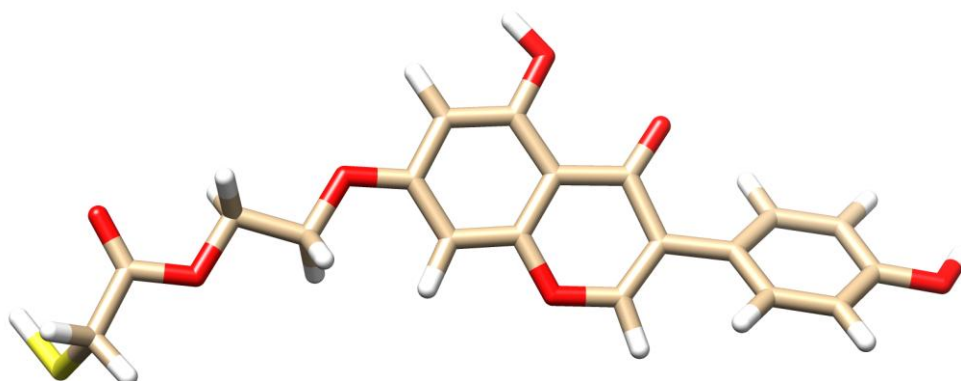

**Fig. S3.** The optimal geometry of the TGE molecule where the intramolecular hydrogen bond does not appear. The H(O at C-5)-O(at C-4) distance is 3.63 Å. Colors of atoms and the method of calculations as in the Figure S2.

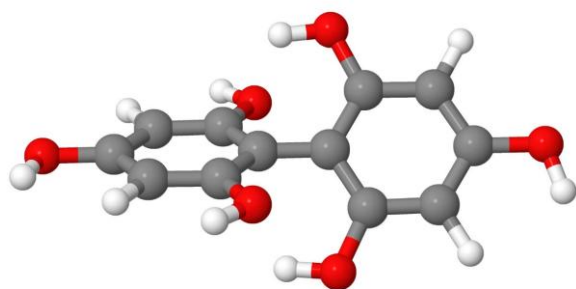

**Fig. S4.** The optimal geometry of the adduct of the 1,3,5-trihydroxybenzene linked by the C-C bond, following the B3LYP/6-311++G(d,p) calculations.

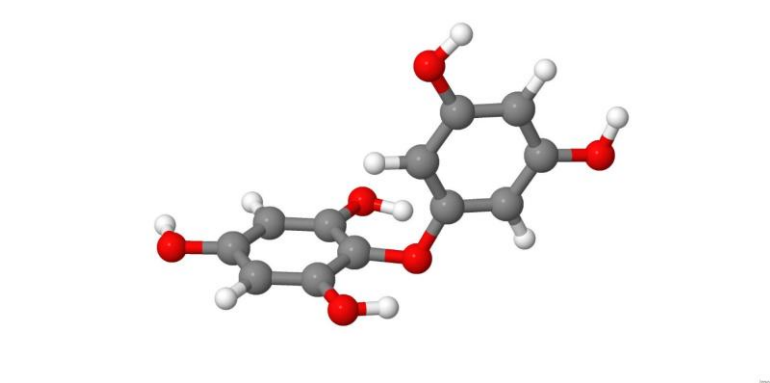

**Fig. S5.** The optimal geometry of the adduct of the 1,3,5-trihydroxybenzene linked by the C-O-C bond, following the B3LP/6-311++G(d,p) calculations.
